# Supplementary material
Source: PubMed Central journal article supplement (PMC7721477)
Supplement: NIHMS1650394-supplement-supplemental_materials.pdf [file NIHMS1650394-supplement-supplemental_materials.pdf]

**Supplemental Material:** Adaptation of Newcastle-Ottawa Quality Assessment Scale for Cross-sectional Studies. (Adapted from Herzog R, Álvarez-Pasquin MJ, Díaz C, Del Barrio JL, Estrada JM, Gil Á. Are healthcare workers' intentions to vaccinate related to their knowledge, beliefs and attitudes? a systematic review. *BMC Public Health*. 2013;13:154. CC BY. License information: <https://creativecommons.org/licenses/by/2.0/legalcode>.)

## **Adaptation of Newcastle-Ottawa Quality Assessment Scale for Cross-sectional Studies**

Note: Quality is assessed on an overall scale of 0-4 with a maximum of one point for the representativeness and response domains and a maximum of two points for the outcome ascertainment domain. Each asterisk corresponds to one point.

- 1) Representativeness of the sample:
  - a) Truly representative of the average in the target population. \* (all subjects or random sampling)
  - b) Somewhat representative of the average in the target population. \* (non-random sampling)
  - c) Selected group of users.
- 2) Non-respondents:
  - a) Comparability between respondents and non-respondents characteristics is established, and the response rate is satisfactory. \*
  - b) The response rate is unsatisfactory, or the comparability between respondents and non-respondents is unsatisfactory.
  - c) No description of the response rate or the characteristics of the responders and the non-responders.
- 3) Assessment of the outcome:
  - a) Validated measurement tool \*\*
  - c) Self report.
  - d) No description.
